# Supplementary material
Source: Research Square preprint supplement (doi:10.21203/rs.3.rs-9036212/v1)
Supplement: Supplementary file 1 [file 9b827904044fc8154e287ed6.docx]

**
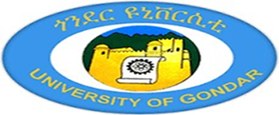
**

**UNIVERSITY OF GONDAR**

**College of Veterinary Medicine and Animal Sciences**

**Questionnaire on Knowledge, Attitudes, and Practices Regarding Taeniid Infection in Dogs in Gondar and Bahir Dar Cities, Ethiopia**

**A. Knowledge (5 Questions)**

(Correct/ Yes = 1, Incorrect/don’t know/ No = 0)

| No | Question | Coding |

| 1 | Do you know that dogs can carry worms that infect humans? | 1 , 0 |

| 2 | Can dog feces cause disease in humans? | 1 , 0 |

| 3 | Are you aware that feeding raw offal can transmit worms to dogs? | 1 , 0 |

| 4 | Can tapeworm eggs in dog feces survive in the environment? | 1 , 0 |

| 5 | Do you know that regular deworming prevents infection in dogs? | 1 , 0 |

**B. Attitude (3 Questions)**

(Positive = 1, Negative/Neutral = 0)

**| No | Question | Coding |**

| 1 | Do you think tapeworms in dogs are a serious health problem | 1 , 0 |

| 2 | would you be willing to deworm your dog regularly? | 1 , 0 |

| 3 | Do you agree that dogs should not roam freely near humans/livestock? | 1 , 0 |

**C. Practice (3 Questions)**

(Desirable practice = 1, undesirable = 0)

**| No | Question | Coding** |

| 1 | Do you deworm your dog regularly? | 1 , 0 |

| 2 | Do you prevent your dog from eating raw offal or meat? | 1 , 0 |

| 3 | Do you properly dispose of dog feces? | 1 , 0 |
