# Supplementary material
Source: Research Square preprint supplement (doi:10.21203/rs.3.rs-9036212/v1)
Supplement: Supplementary file 2 [file bb04fe7a04dcd51d5249be42.docx]

Table 1: The risk factors with prevalence of Taeniid eggs in dogs in Bahir Dar and Gondar Cities, 2025/26

| **Variable** | **Category** | **No of Examined** | **No positive (%)** | **χ2** | **P-value** |
| --- | --- | --- | --- | --- | --- |
| Age | young | 97 | 13(13.4) |  |  |
|  | Adult | 217 | 74(34.1) |  |  |
|  | Old | 110 | 38(34.5) | 15.6 | 0.001 |
| Sex | Female | 93 | 45(48.3) |  |  |
|  | Male | 331 | 80(24.2) | 20.4 | 0.001 |
| Breed | Local | 394 | 120(30.5) |  |  |
|  | cross | 30 | 5 (16.6) | 2.55 | 0.11 |
| Clinical signs | No | 381 | 90 (23.6) |  |  |
|  | Yes | 43 | 35(81.4) | 62 | 0.001 |
| Deworming History | No | 389 | 122 (31.4) |  |  |
|  | Yes | 35 | 3(85.7) | 8.02 | 0.005 |
| Feeding habit | Free | 133 | 64(48.1) |  |  |
|  | Semi-scavenging | 123 | 39(31.7) |  |  |
|  | Owner fed | 168 | 22 (13.1) | 44.2 | 0.001 |
| Roaming status | Free | 128 | 66 (51.6) |  |  |
|  | Confined | 296 | 59 (19.9) | 43 | 0.001 |
| Knowledge level | Poor | 298 | 112 (40.9) |  |  |
|  | Moderate | 117 | 12 (10.3) |  |  |
|  | Good | 9 | 1(11.1) | 31.7 | 0.001 |
| Attitude level | Negative | 275 | 103 (37.5) |  |  |
|  | Neutral | 138 | 20 (14.5) |  |  |
|  | Positive | 11 | 2 (18.2) | 23.9 | 0.001 |
| Practice level | Poor | 390 | 120 (30.7) |  |  |
|  | Moderate | 34 | 5 (14.7) |  | 0.3 |
|  | Good | 0 | 0 (0) | 3.8 | 0.049 |
| City | Gondar | 256 | 83 (32) |  |  |
|  | Bahir Dar | 168 | 42 (25) | 2.7 | 0.1 |

Table 2 : Multivariate logistic regression analysis of risk factors for the occurrence of Taeniida eggs in dogs in Bahir Dar and Gondar, 2025/26

| **Variable** | **Level** | **Odds Ratio** | **95 %CI** | **P-Value** |
| --- | --- | --- | --- | --- |
| Age | young |  |  |  |
|  | Adult | 2.03 | 0.92-4.44 | 0.076 |
|  | Old | 2.8 | 1.17 -6.63 | 0.024 |
| Sex | Female |  |  |  |
|  | Male | 0.43 | 0.23-0.79 | 0.007 |
| Breed | Local |  |  |  |
|  | cross | 1.09 | 0.24-5.03 | 0.91 |
| Clinical signs | Present |  |  |  |
|  | Absent | 25.9 | 9.88 -67.9 | 0.001 |
| Deworming History | No |  |  |  |
|  | Yes | 0.58 | 0.12 -2.7 | 0.49 |
| Feeding habit | Free |  |  |  |
|  | Semi-scavenging | 4.05 | 0.99-16.5 | 0.051 |
|  | Owner fed | 2.6 | 0.64-10.6 | 0.18 |
| Roaming status | Free |  |  |  |
|  | Confined | 0.05 | 0.01 -0.22 | 0.001 |
| Knowledge level | Poor |  |  |  |
|  | Moderate | 0.38 | 0.15-0.9 | 0.029 |
|  | Good | 0.59 | 0.06-5.63 | 0.65 |
| Attitude level | Negative |  |  |  |
|  | Neutral | 0.7 | 0.34-1.48 | 0.35 |
|  | Positive | 1.33 | 0.17-10.5 | 0.78 |
| Practice level | Poor |  |  |  |
|  | Moderate | 2.1 | 0.51-8.79 | 0.3 |
| City | Gondar |  |  |  |
|  | Bahir dar | 0.65 | 0.37-1.13 | 0.127 |
|  |  |  |  |  |
